# How does date-rounding affect phylodynamic inference for public health?

Leo A. Featherstone<sup>\*,1</sup>, Danielle J. Ingle<sup>1</sup>, Wytamma Wirth<sup>1</sup>,  
Sebastian Duchene<sup>1,2</sup>

September 11, 2024

<sup>1</sup> Peter Doherty Institute for Infection and Immunity, University of Melbourne, Australia.

<sup>2</sup> Department of Computational Biology, Institut Pasteur, Paris, France.

\* [leo.featherstone@unimelb.edu.au](mailto:leo.featherstone@unimelb.edu.au)

## 1 Abstract

2 Phylodynamic analyses enable the inference of epidemiological parameters from pathogen  
3 genome sequences for enhanced genomic surveillance in public health. Pathogen  
4 genome sequences and their associated sampling times are the essential data in every  
5 analysis. However, sampling times are usually associated with hospitalisation or test-  
6 ing dates and can sometimes be used to identify individual patients, posing a threat  
7 to patient confidentiality. To lower this risk, sampling times are often given with  
8 reduced date-resolution to the month or year, which can potentially bias inference  
9 of epidemiological parameters. Here, we characterise the extent to which reduced  
10 date-resolution biases phylodynamic analyses across a diverse range of empirical and  
11 simulated datasets. We develop a practical guideline on when date-rounding biases  
12 phylodynamic inference and we show that this bias is both unpredictable in its direc-  
13 tion and compounds with decreasing date-resolution, higher substitution rates, and  
14 shorter sampling intervals. We conclude by discussing future solutions that prioritise  
15 patient confidentiality and propose a method for safer sharing of sampling dates by  
16 translating them uniformly by a random number.

## 17 Introduction

18 Phylodynamics is commonly used to estimate the parameters of viral spread with  
19 increasing application to bacteria. It allows estimation of important epidemiological  
20 quantities including rates of transmission, the age of outbreaks, rates of spatial ad-  
21 vance, and the prevalence of variants of concern ([Attwood \*et al.\*, 2022](#), [du Plessis and  
22 Stadler, 2015](#), [Featherstone \*et al.\*, 2022](#), [Volz, 2023](#)). It is applicable across the scales  
23 of transmission from the pandemic and epidemic scales, such as for SARS-CoV-2  
24 and Ebola virus ([Lancet, 2021](#), [Mbala-Kingebeni \*et al.\*, 2019](#)), to long-term bacterial  
25 transmission such as in *Salmonella enterica* and *Klebsiella pneumoniae*. Phylody-  
26 namic analyses are most useful where temporal and spatial records of transmission  
27 are sparse, using genomic information to help fill in the gaps.

28 The basis of all phylodynamic inference is that epidemiological spread leaves a  
29 trace in the form of substitutions in pathogen genomes that can be used to recon-  
30 struct transmission histories. Pathogen populations meeting this assumption are said  
31 to be ‘measurably evolving populations’ ([Biek \*et al.\*, 2015](#), [Drummond \*et al.\*, 2003](#)).  
32 In accordance, phylodynamics uses a combination of genome sequences and associ-  
33 ated sampling times to leverage measurable evolution and infer temporally explicit  
34 parameters of transmission and pathogen demography.

35 Ideal phylodynamic datasets should include precise sampling dates alongside genome  
36 sequences ([Black \*et al.\*, 2020](#)), but sampling times necessarily carry over sensitive in-

37 formation about times of hospitalisation, testing, or treatment than can be used to  
38 identify individual patients. This can pose an unacceptable risk for patient confiden-  
39 tiality. In some cases, sampling times or dates of admission are even available for  
40 purchase or have allowed identification for a majority of patients in a given record  
41 (Sweeney, 2013). In acknowledgement of this risk, Shean and Greninger (2018) sug-  
42 gest that Expert Determination govern whether sampling times be released alongside  
43 genome sequences, and the resolution to which they are disclosed (day, month, year).  
44 Essentially, this approach involves an expert opinion on whether information is safe  
45 to release on a case-by-case basis.

46 From a phylodynamic point of view, sampling times with reduced resolution are  
47 usable. Uncertainty in sampling times can be accommodated in Bayesian inference  
48 (Shapiro *et al.*, 2011), but such an approach is only effective when samples with  
49 uncertain dates comprise a small proportion of the total data (Rieux and Khatchikian,  
50 2017).

51 The most common technique for incorporating data with a majority of uncertain  
52 sampling times is to assume that sampling occurred at the middle of the uncertainty  
53 range, such as all samples from 2020 being assigned 15 June 2020. Other approaches  
54 would include sampling a random day within 2020 using a probability distribution  
55 over the duration of 2020 for each sample. Both approaches introduce a degree of  
56 error, which may cause bias because sampling times can drive phylodynamic infer-

57 ence (Featherstone *et al.*, 2021, 2023, Volz and Frost, 2014). Understanding this  
58 bias has practical significance, as there are many examples of phylodynamic analyses  
59 conducted with reduced date resolution for a diverse array of pathogens. These in-  
60 clude viral pathogens such as Rabies Virus, Enterovirus, SARS-CoV-2, Dengue virus  
61 (Bennett *et al.*, 2010, Talbi *et al.*, 2010, Wolf *et al.*, 2022, Xiao *et al.*, 2022), and  
62 bacterial pathogens, such as *Klebsiella pneumoniae*, *Streptococcus pneumoniae*, and  
63 *Mycobacterium tuberculosis* (Azarian *et al.*, 2018, Cella *et al.*, 2017, Merker *et al.*,  
64 2015).

65 Precision in sampling dates is also relevant to the design and curation of pathogen  
66 sequence databases because sampling dates are often considered as metadata, and  
67 thus recorded inconsistently throughout repositories (Raza and Luheshi, 2016). For  
68 example, as of early September 2024, there were roughly 19.9M SARS-CoV-2 genome  
69 sequences available on GISAID with roughly 2.4% (382K) of these having incomplete  
70 date information, where sampling dates are absent or only given to the month or year.  
71 In other words, roughly 1 in 50 sequences lacked clear date resolution, reflecting global  
72 inconsistency in SARS-CoV-2 sampling time records.

73 In recognition of this issue, we characterised the conditions under which biases  
74 arise from reduced date resolution in phylodynamic inference. We analysed four  
75 empirical datasets of SARS-CoV-2, H1N1 Influenza, *M. tuberculosis*, *Staphylococcus*  
76 *aureus*, and conducted a simulation study with parameters corresponding to each em-

77 pirical dataset. These pathogens are key examples of candidates for genome surveil-  
78 lance, with SARS-CoV-2 and H1N1 having caused pandemics and *S. aureus* and  
79 *M. tuberculosis* being global priority pathogens (WHO, 2024). These data also have  
80 diverse infectious periods and molecular evolutionary rates, thus providing a broad  
81 representation of phylodynamics' applicability to pathogens presenting human-health  
82 threats. For each empirical and simulated dataset, we studied the bias in estimated  
83 epidemiological parameters across treatments with sampling times rounded to the  
84 day, month, or year. For example, 2021-10-11 would be specified as 2021-10-15 when  
85 rounding to the month and 2021-06-15 when the month and day are not provided.

86 We focused on inference of the reproductive number ( $R_0$  or  $R_e$  for the basic and  
87 effective reproductive number, respectively), defined as the average number of sec-  
88 ondary infections stemming from an individual case (reviewed by du Plessis and  
89 Stadler (2015), Featherstone *et al.* (2022), Kühnert *et al.* (2011)), the time to the  
90 most recent common ancestor (tMRCA), and the substitution rate (substitutions per  
91 site per year) in each dataset. Together, these parameters span much of the insight  
92 that phylodynamics offers through inferring when an outbreak started and how fast it  
93 proceeded. The evolutionary rate is also the central parameter relating evolutionary  
94 time to epidemiological time, so any resulting bias in this parameter is expected to  
95 have a pervasive effect throughout each phylodynamic model.

96 We hypothesised that reduced date resolution causes bias that compounds where

97 the uncertainty in dates exceeds the average time for a substitution to arise in a given  
98 pathogen. We visualise the relationship between date resolution and average substi-  
99 tution time in Fig 1. For example, H1N1 influenza virus accumulates substitutions at  
100 a rate of about  $4 \times 10^{-3}$  subs/site/year (Hedge *et al.*, 2013). With a genome length  
101 of 13,158bp, we then expect roughly one substitution to accrue per week. Therefore,  
102 rounding dates to the month or year conflates molecular evolution in time and bi-  
103 ases inferences. Based on this, we expected the SARS-CoV-2 and H1N1 datasets to  
104 exhibit bias from month resolution onwards, the *S. aureus* dataset to exhibit bias  
105 at year resolution, and the *M. tuberculosis* dataset to not display bias up to and  
106 including year resolution (See Table 2 for average substitution times).

107 Our results across the simulation study and analyses of empirical data support  
108 using the average substitution time as a rough threshold for when date-rounding  
109 causes compounding bias. We also discuss factors that modulate the extent of bias,  
110 such as duration of sampling intervals and the choice of phylodynamic model. We  
111 finish by discussing future solutions that prioritise both patient confidentiality and  
112 accurate data sharing for routine phylodynamic analyses for public health.

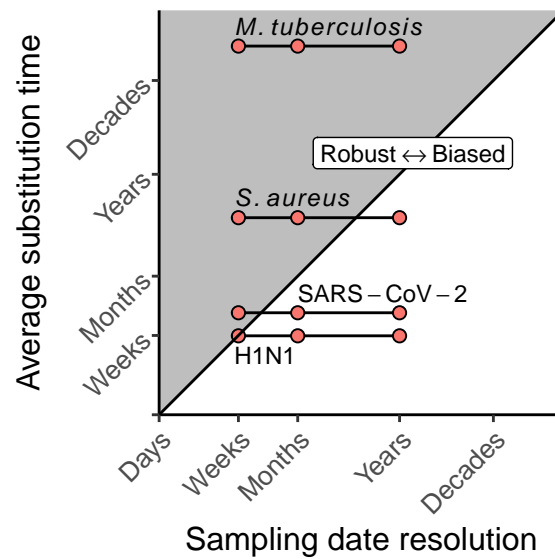

Figure 1: The average time to accrue one substitution based on a fixed genome size and evolutionary rate,  $T_s = [\text{Genome Length (sites)} \times \text{Evolutionary rate (subs/site/yr)}]^{-1}$  against the temporal resolution lost by date-rounding. We hypothesised and showed that when analyses for a given pathogen round dates to an extent nearing or crossing the diagonal from left to right, biases is induced in  $R_e$ , tMRCA, and substitution rate. substitution rates are taken from each source for the empirical data. We do not report the numerical axis as this figure is designed to illustrate a concept rather than serve as a reference, in the same spirit as is inspiration in Figure 2 of [Biek \*et al.\* \(2015\)](#).

## 113 Methods

### 114 Overview

115 Our study is based on four empirical datasets including with two viruses, H1N1  
 116 influenza and SARS-CoV-2, and two bacterial species, *Staphylococcus aureus* and  
 117 *Mycobacterium tuberculosis*. We also conducted a simulation study with parameters  
 118 tailored to each dataset. These data were chosen to span the usual parameter space for

119 substitution rate and sampling duration in phylodynamics for epidemiology (roughly  
120  $10^{-3}$ -to- $10^{-8}$  (subs/site/yr) for substitution rate and months-to-decades for duration  
121 of sampling).

122 To assess the effects of date-rounding, we conducted phylodynamic analyses for  
123 both the empirical and simulated datasets with sampling dates rounded to the day,  
124 month, or year. For example, two samples from 2000-05-29 and 2000-05-02 would  
125 become 2000-05-15 if rounded to the month. We then measured the resulting bias  
126 in epidemiologically- or phylodynamically-important parameters: the reproductive  
127 number ( $R_0$  or  $R_e$ ), substitution rate (subs/site/year), and the tMRCA. The tMRCA  
128 gives a measure of the age of the pathogen population driving the outbreak and is  
129 often interpreted as the age of the outbreak. We also consider the tMRCA to facilitate  
130 comparison, because there is variability in which phylodynamic models include the  
131 length of the root branch in the age of the outbreak (Stadler *et al.*, 2012).

132 The two viral datasets consist of samples from the 2009 H1N1 pandemic (n=161)  
133 from Hedge *et al.* (2013), and a cluster of early SARS-CoV-2 cases from Victoria,  
134 Australia in 2020 (n = 112) (Lane *et al.*, 2021). The bacterial datasets consist of  
135 *S. aureus*, with 104 samples from New York sampled over  $\approx 2$  years (Duchêne *et al.*,  
136 2016, Uhlemann *et al.*, 2014, Volz and Didelot, 2018), and 30 *M. tuberculosis* sam-  
137 ples from an  $\approx 25$  year outbreak studied by Kühnert *et al.* (2018). These data were  
138 chosen because they encompass a diversity of epidemiological dynamics, timescales,



139 and variable substitution rates.

## 140 **Simulation Study**

141 We simulated outbreaks as birth-death sampling processes using the ReMaster pack-  
142 age in BEAST v2.7.6 (Bouckaert *et al.*, 2019, Vaughan, 2024). Simulations consisted  
143 of four parameter settings corresponding to each empirical dataset (Table 1), with 100  
144 replicates of each. All parameter sets include a proportion of sequenced cases ( $p$ ), out-  
145 break duration ( $T$ ), and a ‘becoming un-infectious’ rate ( $\delta = \frac{1}{\text{Duration of infection}}$ ).  
146 For simulations corresponding the viral datasets, transmission was modelled via  $R_0$ ,  
147 the average number of secondary infections (assuming a fully susceptible population).  
148 For those corresponding to the bacterial datasets, we allowed the effective reproduc-  
149 tive numbers to vary over two intervals ( $R_{e_1}$  and  $R_{e_2}$  respectively). For the *S. aureus*  
150 setting, the change time for  $R_e$  was set at  $t = 22$  with the sequencing proportion  
151 ( $p$ ) also set to zero before this time to replicate the sampling effort in the empiri-  
152 cal dataset. For the *M. tuberculosis* dataset, the change time was fixed at halfway  
153 through simulations ( $t = 12.5$ ) with a fixed sequencing proportion throughout.

Table 1: Parameter sets for the simulation study corresponding to each empirical dataset.  $\delta$  is the ‘becoming un-infectious’ rate, which is the reciprocal of the duration of infection in units of years<sup>-1</sup>.  $R_0$  is the basic reproductive number, describing the average number of secondary infections arising at the beginning of an outbreak where the susceptible population is greatest.  $R_{e\bullet}$  refer to the effective reproductive number over two successive intervals of an outbreak as the susceptible population varies.  $p$  is the proportion of sequenced cases.  $T$  is the duration of the outbreak.

| Microbe                | $\delta(\text{yrs})^{-1}$ | $R_0$ | $R_{e_1}$ | $R_{e_2}$ | $p$              | $T(\text{yrs})$ | Source                                |
|------------------------|---------------------------|-------|-----------|-----------|------------------|-----------------|---------------------------------------|
| H1N1                   | 91.31                     | 1.3   | -         | -         | 0.015            | 0.25            | <a href="#">Hedge et al. (2013)</a>   |
| SARS-CoV-2             | 36.56                     | 2.5   | -         | -         | 0.80             | 0.16            | <a href="#">Lane et al. (2021)</a>    |
| <i>S. aureus</i>       | 0.93                      | -     | 2.0       | 1.0       | 0.2 <sup>†</sup> | 25              | <a href="#">Duchêne et al. (2016)</a> |
| <i>M. tuberculosis</i> | 0.125                     | -     | 2.0       | 1.10      | 0.08             | 25.0            | <a href="#">Kühnert et al. (2018)</a> |

154     <sup>†</sup>  $p$  was set to zero before  $T = 22$

155     Simulations generated a total of 400 outbreaks which we then used to simulate  
156 sequences data under a Jukes-Cantor model using Seq-Gen v1.3.4 ([Rambaut and](#)  
157 [Grass, 1997](#)) with fixed substitution rates (Table 2). We chose a simple substitution  
158 model to reduce parameter space and because substitution model mismatch has been  
159 widely explored elsewhere (e.g. [Lemmon and Moriarty \(2004\)](#)).

Table 2: Substitution rates and genome length for sequence simulation.

| Microbe                | Substitution Rate (subs/site/yr) | Genome Length | Time/Sub/Genome (yrs) |
|------------------------|----------------------------------|---------------|-----------------------|
| H1N1                   | $4 \times 10^{-3}$               | 13158         | 0.0190                |
| SARS-CoV-2             | $1 \times 10^{-3}$               | 29903         | 0.0334                |
| <i>S. aureus</i>       | $1 \times 10^{-6}$               | 2900000       | 0.3458                |
| <i>M. tuberculosis</i> | $1 \times 10^{-7}$               | 4300000       | 2.3256                |

160 We then analysed each of the 400 simulated datasets under each tree prior and  
161 three date resolutions (day, month, and year), yielding 1800 analyses (1200 for the  
162 birth-death and 600 for coalescent with exponential growth, referred to hereon as  
163 the ‘coalescent exponential’ or CE). We used identical model specifications and prior  
164 distributions as for the corresponding empirical datasets. We ran each MCMC chain  
165 for  $5 \times 18^8$  steps, sampling every  $10^{4\text{th}}$  step and discarding the first 50% as burnin.  
166 We then discarded all analyses that did not have effective sample sizes of the MCMC  
167 ( $ESS$ ) of at least 200 ( $ESS \geq 200$ ), leaving a total of 1670 replicates incorporated  
168 in our results.

## 169 Empirical Data

170 We conducted Bayesian phylodynamic analyses using a birth-death skyline tree prior  
171 in BEAST v2.7.6 for all datasets ([Bouckaert \*et al.\*, 2019](#), [Stadler \*et al.\*, 2012](#)). We also

172 fit a coalescent tree prior with exponential population growth for the viral datasets  
173 (Kingman, 1982). We sampled from the posterior distribution using Markov chain  
174 Monte Carlo (MCMC), with  $5 \times 10^7$  steps ( $1 \times 10^7$  for SARS-CoV-2 data), sampling  
175 every  $10^4$  steps, and discarding the initial 10% as burnin. We assessed sufficient  
176 sampling from the stationary distribution by ensuring  $ESS \geq 200$  for all parameters  
177 and likelihoods.

## 178 H1N1

179 The H1N1 data consist of 161 samples from North America during the 2009 H1N1  
180 influenza virus pandemic, previously analysed by Hedge *et al.* (2013). Samples orig-  
181 inate from April to September 2009 and provide an example of a rapidly evolving  
182 pathogen sparsely sequenced during an emerging outbreak.

183 Under the birth-death model, we placed a Lognormal( $\mu = 0, \sigma = 1$ ) prior on  $R_0$ ,  
184  $\beta(1, 1)$  prior on  $p$ , and fixed the becoming-uninfectious rate to ( $\delta = 91 \text{ years}^{-1}$ ), cor-  
185 responding to a four-day duration of infection. We also placed an improper ( $U(0, \infty)$ )  
186 prior on the age of the outbreak and a Gamma(shape = 2, rate = 400) prior on the  
187 substitution rate.

188 Under the coalescent exponential, we placed a Laplace( $\mu = 0, \text{scale} = 100$ ) prior  
189 on the growth rate, which was later transformed to  $R_0$  via  $R_0 = rD + 1$  where  $r$  is  
190 the growth rate and  $D$  is the duration of infection. We also placed an improper prior

191 on the effective population size, and otherwise included the same priors as for the  
192 birth-death.

### 193 SARS-CoV-2

194 The SARS-CoV-2 data consist of 112 samples from a densely sequenced transmission  
195 cluster from Victoria, Australia over late July to mid September 2020 [Lane et al.](#)  
196 [\(2021\)](#). These data are similar to the H1N1 datasets in presenting a quickly evolving  
197 viral pathogen, but differ in that a high proportion of cases were sequenced.

198 Under the birth-death, we placed a Lognormal(mean = 1, sd = 1.25) prior on  $R_0$   
199 and an Inv-Gamma( $\alpha = 5.807$ ,  $\beta = 346.020$ ) prior on the becoming-uninfectious rate  
200 ( $\delta$ ). The sampling proportion was fixed to  $p = 0.8$  since every the target was to  
201 sequence every known SARS-CoV-2 case in Victoria at this stage of the pandemic,  
202 with a roughly 20% sequencing failure rate. We also placed an Exp(mean = 0.019)  
203 prior on the origin, corresponding to a lag of up to one week between the index  
204 case and the first putative transmission event. Lastly, we placed a Gamma(shape =  
205 2, rate = 2000) prior on the substitution rate.

206 Under the coalescent exponential, we placed an improper prior ( $\frac{1}{x}$ ) on the effective  
207 population size and a Laplace( $\mu = 0.01$ , scale = 0.5) prior on the growth rate. Other  
208 parameters were given the priors as under the birth-death. Note that we fit the  
209 coalescent exponential tree prior for completeness here, but in practice it would not be

210 a reliable model choice due to the high sequencing proportion violating the assumption  
211 of a low sequencing proportion under the coalescent. This poor fit is reflected later  
212 in the results.

### 213 *Staphylococcus aureus*

214 The *S. aureus* dataset originates from [Uhlemann \*et al.\* \(2014\)](#) and we analysed a  
215 subset of the data later analysed in [Duchêne \*et al.\* \(2016\)](#) and [Volz and Didelot \(2018\)](#).  
216 It consists of a single nucleotide polymorphism (SNP) alignment of 104 sequenced  
217 isolates sampled in New York from 2009 to 2011. Populations growth is understood  
218 to have been driven by  $\beta$ -lactam antibiotic use beginning in the 1980s. These data  
219 therefore provide a comparison to the *M. tuberculosis* dataset in a briefer sampling  
220 span from an outbreak of similar duration.

221 To accommodate changing transmission dynamics, we included two intervals for  
222  $R_e$  with a Lognormal( $\mu = 0, \sigma = 1$ ) prior on each. We also placed a  $\beta(1, 1)$  prior  
223 on the sampling proportion, which was otherwise fixed to 0 before the first sample  
224 to capture the lag in sampling. We also placed a  $U(0, 1000)$  prior on the origin, and  
225 fixed the becoming un-infectious rate at  $\delta = 0.93$ , corresponding to a nearly year-long  
226 duration of infection following [Volz and Didelot \(2018\)](#).

## 227 *Mycobacterium tuberculosis*

228 The *M. tuberculosis* dataset consists of 36 sequenced isolates from a retrospectively  
229 recognised outbreak in California, USA, that originated in the Wat Tham Krabok  
230 refugee camp in Thailand. The data were originally analysed using the birth-tree  
231 prior by Kühnert *et al.* (2018). We applied the same prior configurations as Kühnert  
232 *et al.* (2018), with the exception of including two intervals for  $R_e$  and fitting a strict  
233 molecular clock with a Gamma(shape = 0.001, rate = 1000.0) prior.

## 234 Results

### 235 Simulation study

236 The viral simulation conditions (i.e. SARS-CoV-2 and H1N1) display the greatest  
237 bias in mean posterior estimates of substitution rate, tMRCA, and reproductive num-  
238 ber with decreasing date resolution (Figure 2 A-C). The *S. aureus* simulations exhibit  
239 similar trend with lesser bias in response to decreasing date resolution when rounding  
240 dates to the year. The *M. tuberculosis* condition is effectively inert to decreasing date  
241 resolution, with mean posterior estimates for each parameter of interest remaining  
242 consistent across date resolution (day to year). The *S. aureus* data provide an impor-  
243 tant intermediate case in that estimates of each parameter change when transitioning  
244 from month to year resolution (see crossing of lines from month to year resolution in

245 the *S. aureus* column of Figure 2). These trends are in agreement with the hypothesis  
246 of decreasing date resolution causing increased bias where the resolution lost exceeds  
247 the average time for a substitution to arise. This occurs because date-rounding com-  
248 presses divergent sequences in time, driving a signal for higher rates of substitution  
249 and transmission locally to each temporal cluster of sampling times. This effect is  
250 less pronounced in the bacterial simulation conditions relative to the viral conditions,  
251 because the date resolution lost is a smaller fraction of the effective substitution time  
252 (average time to until substitution is  $\approx 4$  months and  $\approx 28$  months for *S. aureus*  
253 and *M. tuberculosis* conditions respectively, Table 2). In other words, the bacterial  
254 sequences clustered in time were on average less divergent than for the viral data,  
255 which is biologically realistic given that bacteria tend to accrue substitutions more  
256 slowly than viruses. There are also notable deviations from these general trends  
257 across date resolutions, simulation conditions, and tree priors that we attribute to  
258 the duration of the sampling intervals below.



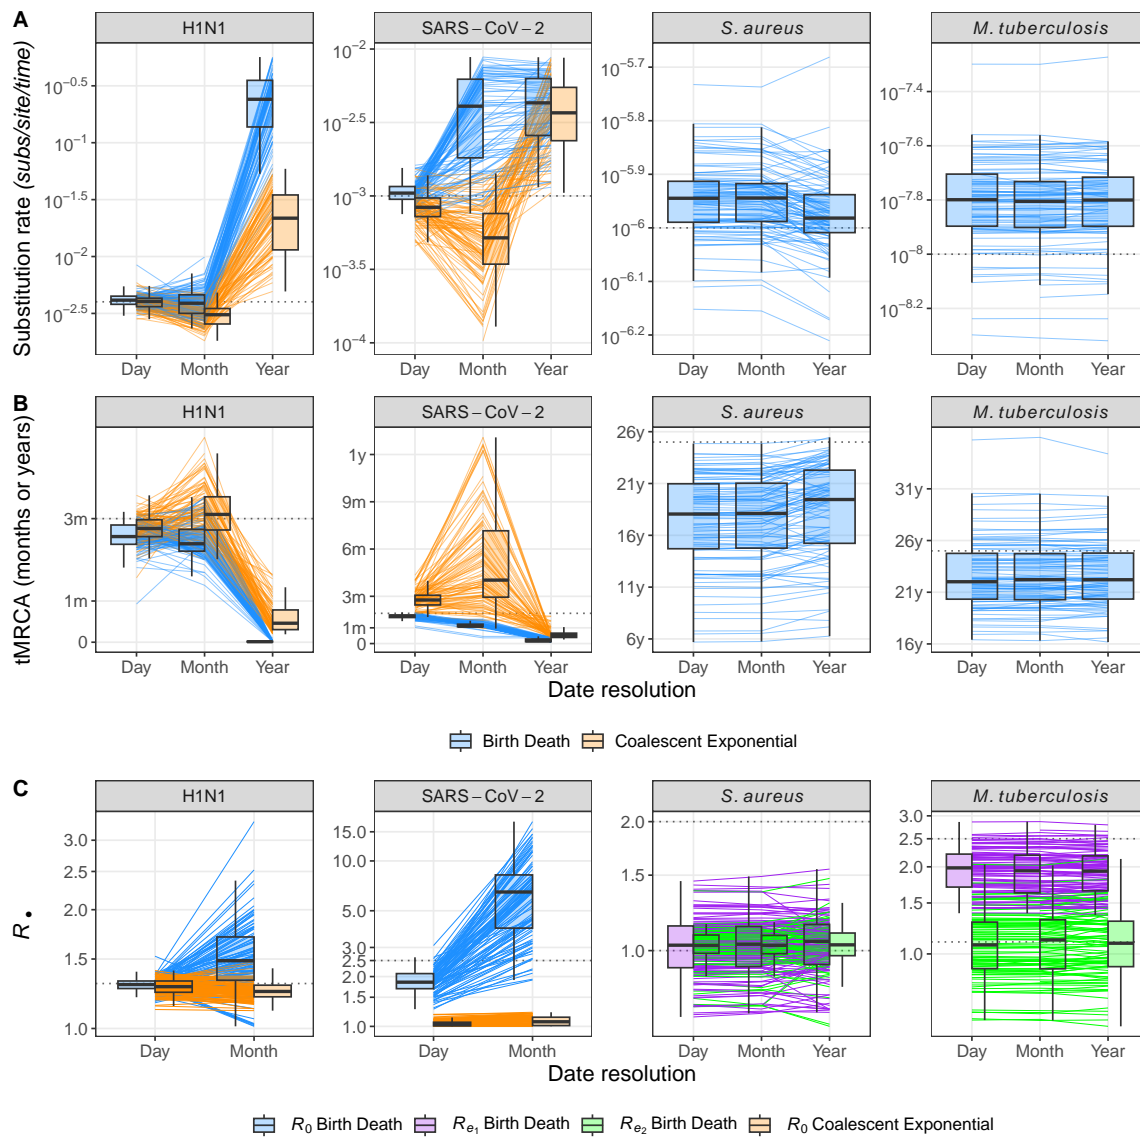

Figure 2: Mean posterior estimates for parameters of interest for each simulated dataset varying across date resolution. Individual lines track mean posterior estimates for each simulated dataset and boxplots are given to summarise the spread and direction of bias across all simulated datasets at each date resolution. Rows correspond to individual parameters, columns correspond to simulation conditions (underlying parameters matching each empirical dataset), and colour corresponds to tree prior or reproductive number interval. Dashed horizontal lines correspond to the true value under which each dataset was simulated. (A) Mean posterior substitution rate across simulation scenarios. (B) Mean posterior tMRCA, a measure of the age of the population driving the outbreak

. (C) mean posterior reproductive number.

259 The coalescent exponential shows overall downwards bias in the substitution rate  
260 for the SARS-CoV-2 and H1N1 treatments at month resolution, while the birth-  
261 death exhibits upwards bias. Since the sampling times for each viral dataset are  
262 distributed over three months, date-rounding compresses samples within a month  
263 to one time, simultaneously increasing the time between samples across months and  
264 driving a signal for lower transmission and substitution rates between months. The  
265 different phylodynamic likelihood functions for each tree prior respond differently  
266 to this warped distribution of diversity over time with the coalescent exponential  
267 placing more weight on decreased rates of substitution rates while the birth-death  
268 favoured an increase. This can be explained by the birth-death drawing signal for  
269 increased transmission among coincident sampling times within each month, while the  
270 coalescent exponential instead conditions on sampling times (Volz and Frost, 2014).  
271 At the year resolution there is there is also lower bias in estimates of substitution rate  
272 for the coalescent exponential than the birth-death, however both models estimate  
273 upwards-biased substitution rates as year resolution. This is probably because year  
274 resolution clusters all sampling times to a single time, meaning a highly inflated rate  
275 of substitution is needed to model the artificial burst in diversity at one time for  
276 both tree priors - See Figure S2 to see sampling times compressed in time across date  
277 resolution for posterior trees. For all viral simulation conditions, the mean posterior  
278 tMRCA of each outbreak shifts inversely to the substitution rate. This is the result

279 of a well understood relationship among phylodynamic models where higher rates of  
280 evolution suggest shorter periods of evolution.

281 The reproductive number for each viral dataset ( $R_0$ ) also changes markedly with  
282 decreasing date resolution under the birth-death, but not under the coalescent. For  
283 the birth-death, this is in agreement with temporal clustering of samples driving  
284 a signal for higher transmission rates. Conversely, estimates under the coalescent  
285 exponential remain near-identical at month resolution, which is again due to its con-  
286 ditioning on sampling times. Estimates of  $R_0$  for the SARS-CoV-2 settings under  
287 the coalescent exponential are also heavily biased downwards. This is probably due  
288 to high sequencing proportions violating the assumption of low sampling under the  
289 coalescent, thus leading to poorly fitting model in the first place.

290 The *S. aureus* condition yields consistent estimates of substitution rate, tMRCA,  
291 and reproductive number ( $R_e$  in this case) when days are rounded to the month (Fig-  
292 ure 2 *S. aureus* column). At year resolution the posterior substitution rate appears  
293 biased downwards. This can be explained by the two year sampling duration of the  
294 *S. aureus* condition, such that samples rounded to the year will be on average fur-  
295 ther apart in time than if dates are given to the month or day (Figure S2). This  
296 spacing of diversity in time likely drives the signal for lower substitution rates and  
297 an older outbreak in turn. There is no clear pattern in the direction of bias for  $R_{e_1}$   
298 and  $R_{e_2}$  at year resolution, though estimates deviate from those at month and day

299 resolution. Estimates for  $R_{e1}$  are also overall lower than their true value of 2.0, and  
300 this is attributable to inconsistent sampling over the duration of the outbreak which  
301 was previously demonstrated for other datasets with late sampling in [Featherstone](#)  
302 *et al.* (2021).

303 The *M. tuberculosis* simulation condition effectively acts as a control, since it  
304 appears inert to date-rounding. This is expected because this dataset reflects longer  
305 simulation time, with temporal clustering less likely to inflate  $R_e$ , and an average  
306 substitution time is longer than a year. As such, even rounding to the year is unlikely  
307 to drive a signal for increased evolutionary rate or a more recent origin time.

308 Phylodynamic and phylogenetic terms from the total posterior likelihood also vary  
309 with decreasing date resolution (Figure S3). deviation also increases with lesser date  
310 resolution from month and year. This verifies that altered date resolution affects the  
311 likelihood manifold of each analysis, which is reflected in the different trends of bias  
312 in each parameter of interest.

## 313 **Empirical Results**

314 Broadly, analyses of the empirical datasets reproduce the patterns of bias in the sim-  
315 ulation study(Figure 3). That is, the reproductive number increases with decreasing  
316 date resolution along with an increase in the substitution rate and corresponding  
317 decrease in the tMRCA. There are a few exceptions to this trend that we consider

318 below and which we again attribute to the difference between simulated and empirical  
319 sampling time distributions.

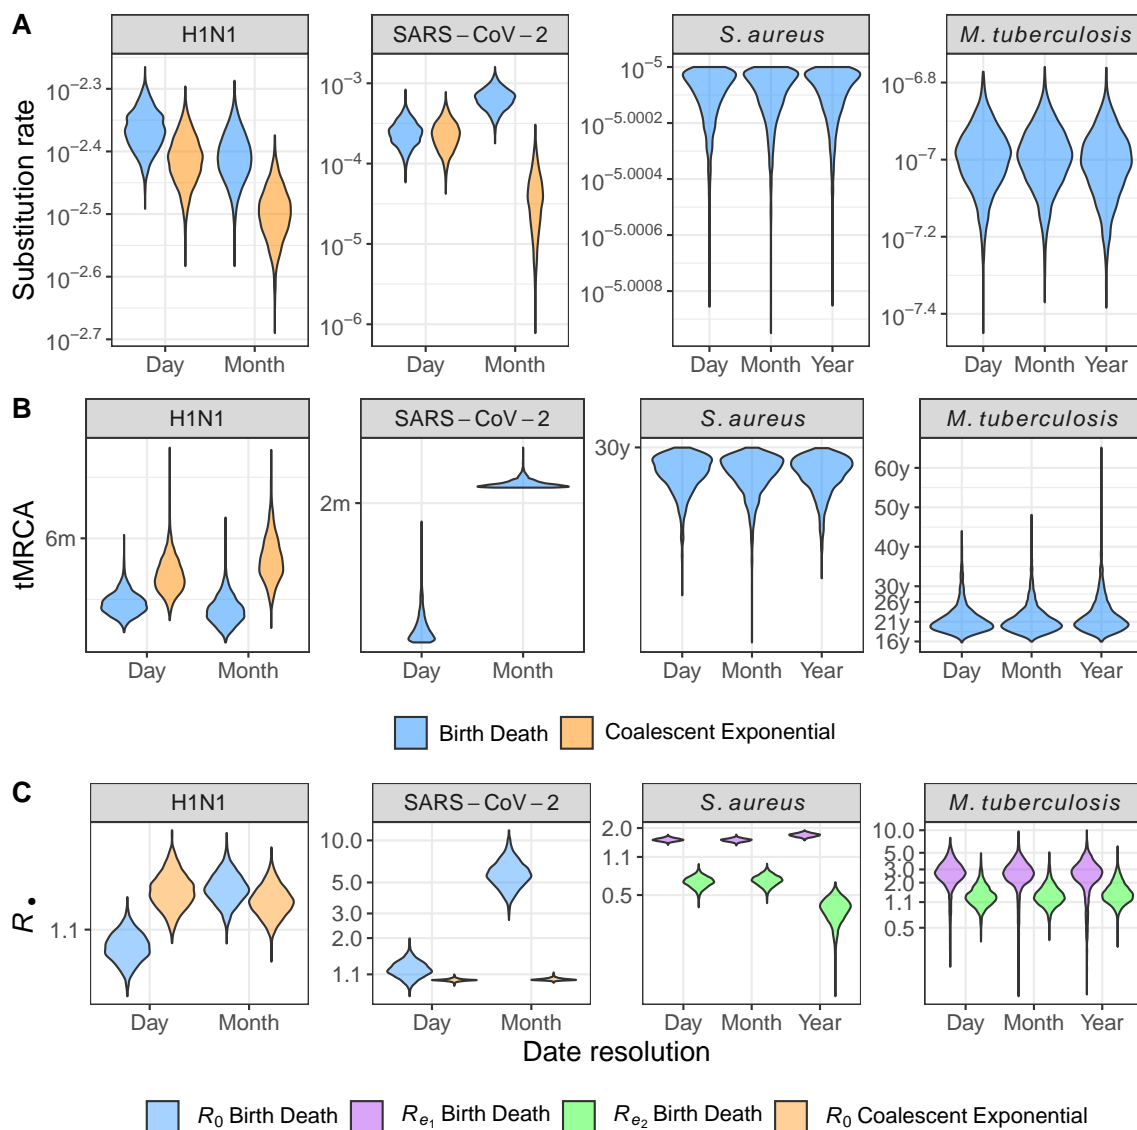

Figure 3: Posterior distributions for parameters of interest estimated for each empirical dataset. Date resolution is given on the horizontal axis and colour denotes tree prior. Estimates for viral datasets at year-resolution are omitted because results deviate by implausible orders of magnitude due to sampling times rounded to identical dates. (A) Posterior substitution rate across date resolutions. (B) Posterior tMRCA in units of months (m) or years (y). (C) Posterior reproductive number on a log-transformed axis.

320

Phylogenetic and phylogenetic likelihoods also diverge where the loss in date

321 resolution exceed the average time for a substitution to arise (Figure 4). For both  
322 viral datasets, month and day posterior distributions of phylodynamic and phyloge-  
323 netic likelihood are diverged, while likelihoods overlap at all date resolutions for the  
324 *M. tuberculosis* data. The *S. aureus* data provide an intermediate case where only  
325 the posterior likelihoods for year-resolution differ. Together, these likelihood distri-  
326 butions support the hypothesis that date-uncertainty that is wider (in time) than the  
327 average time to one substitution causes a qualitative shift in the likelihood manifold  
328 for analyses under both birth-death based and coalescent tree priors.

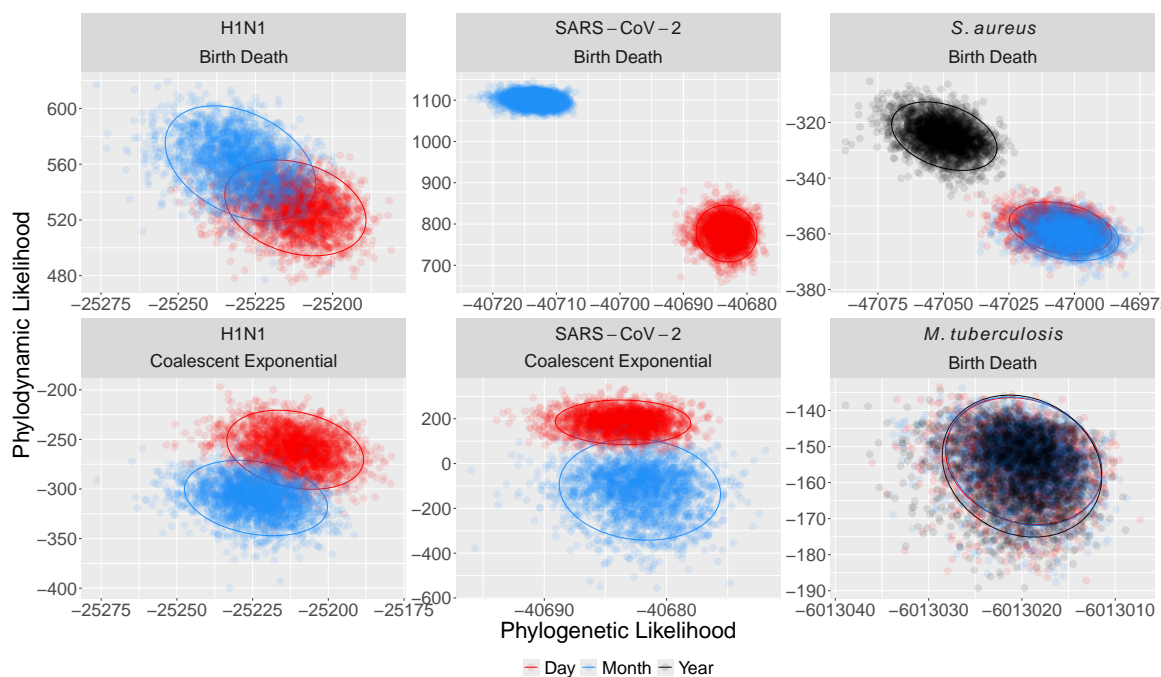

Figure 4: Posterior phylodynamic likelihood against phylogenetic likelihood for each combination of empirical dataset and with colour corresponding to date resolution. Ellipses surround the 95% highest posterior density region for each posterior. Both Phylodynamic and phylogenetic likelihoods diverge between day and month resolution for the viral datasets, while year resolution differs from month and day for the *S. aureus* data. Posterior likelihoods all coincide for *M. tuberculosis*.

329 **H1N1**

330 Mean posterior  $R_0$  increases from day to month resolution for the birth-death (1.08 to  
331 1.14), yet remains near-identical for the coalescent exponential (1.14 to 1.13) (Table  
332 S1). The mean posterior substitution rate also decreases for both tree priors across  
333 day to month resolution ( $4.3 \times 10^{-3}$  to  $3.9 \times 10^{-3}$  and  $3.9 \times 10^{-3}$  to  $3.2 \times 10^{-3}$  for the  
334 birth-death and coalescent exponential respectively) (Table S1). The posterior tM-  
335 RCA also differs between tree priors mirroring substitution rate, with a decrease from  
336 day to month resolution for the birth-death and an increase for the coalescent expo-  
337 nential. For the coalescent exponential, we can attribute the decrease in reproductive  
338 number and substitution rate from day to month resolution to samples being spread  
339 further in time (Figure S1), which drives the signal for an older outbreak and  
340 lower transmission rates. While the same is true for the sampling distribution under  
341 the birth-death, the additional information it draws from identical sampling times as  
342 month-resolution likely inflates the mean posterior reproductive number despite the  
343 signal for a lower substitution rate and older outbreak.

344 **SARS-CoV-2**

345 Under the birth-death, the SARS-CoV-2 dataset behaves as expected, with an in-  
346 crease in posterior  $R_0$  from day to month rounding. In particular, rounding to the  
347 month results in a high, yet plausible value of  $R_0 = 5.972$  (Table S1). Under the



348 coalescent exponential, the mean posterior  $R_0$  remains near identical across day to  
349 month treatments (1.00 to 1.01 respectively). We again note that the coalescent ex-  
350 ponential is included for completeness for the SARS-CoV-2 dataset, but is not an  
351 appropriate choice of model in practice due to the near complete-sequencing of the  
352 original transmission cluster. Thus, poor model-fit is probably the cause of unrealistic  
353 estimates of  $R_0$ .

354 The mean posterior substitution rate under the birth-death increases over two-  
355 fold when rounding to the month ( $2.47 \times 10^{-4}$  to  $6.56 \times 10^{-4}$ , Table S1). Mean  
356 posterior tMRCA also increases from 0.15 years to 0.17 years from day to month,  
357 which contradicts the expectation of a decreased estimate of tMRCA under date-  
358 rounding. We again attribute these differences to the distribution of the empirical  
359 sampling times under date-rounding. Sampling for the SARS-CoV-2 dataset mainly  
360 occurred over August to September 2020, with most August samples originating later  
361 in the month (Figure S1). Rounding to 15<sup>th</sup> of August therefore made these samples  
362 appear older in time and likely contributed to the older origin under month-rounding.

### 363 *S. aureus*

364 For  $R_{e1}$ , the *S. aureus* dataset recapitulated the simulation study with month round-  
365 ing having a minimal effect, but year rounding inducing an upwards bias (mean  
366 values of 1.57, 1.56, 1.73 respectively)(Figure 3, Table S1).  $R_{e2}$  displays a similar

367 pattern with consistent estimates at day and month-rounding before a reduction at  
368 year rounding (0.66, 0.67, and 0.37 respectively). This result is consistent with the  
369 estimates an initial increase in growth rate in previous analyses of the dataset [Volz](#)  
370 [and Didelot \(2018\)](#).

371 Mean posterior substitution rate and tMRCA remain identical across date resolu-  
372 tions ( $10^{-5}$  subs/site/year and a tMRCA of 30 years), despite the change in reproduc-  
373 tive numbers at year rounding. This is surprising given the change in posterior phy-  
374 lodynamic and phylogenetic likelihoods (Figure 4), and highlights that date-rounding  
375 can perturb the likelihood without predictable changes in parameters of epidemiolog-  
376 ical significance.

### 377 *M. tuberculosis*

378 The *M. tuberculosis* data recapitulate the outcome of the simulation study in be-  
379 ing robust to date-rounding. Posterior substitution rates and outbreak ages remain  
380 consistent across decreasing date resolution ( $1.02 \times 10^{-7}$ ,  $1.02 \times 10^{-7}$ ,  $9.86 \times 10^{-8}$   
381 (subs/site/time) and 21.7, 21.7, and 22.5 years respectively) (Table S1, Figure 3).  
382 We also infer that  $R_{e_1} > R_{e_s}$  across date-rounding conditions, coinciding with an  
383 earlier burst of transmission in agreement with [Kühnert et al. \(2018\)](#). However,  $R_{e_1}$   
384 decreases slightly date date-rounding (mean posterior estimates of 2.77, 2.74, 2.66 for  
385 day, month and year rounding)(Table S1), while  $R_{e_2}$  increases (1.4, 1.41, 1.53 from

386 day to year rounding). This was likely caused by the higher number of samples in the  
387 second sampling interval, from roughly 2002 to 2010, such that compressing sampling  
388 times drive drove a signal for higher transmission in the second interval with longer  
389 periods between sampling in the first interval at year resolution. Again, this shows  
390 that distribution of sampling times for empirical data, which is largely unpredictable,  
391 modulate the effects of date-rounding.

## 392 Discussion

393 The results of the simulation study and analyses of empirical data support our hypoth-  
394 esis that phylodynamic inference is most biased where the temporal resolution lost in  
395 date rounding exceeds the average time for one substitution to arise. In the both the  
396 simulation study and empirical analyses, the viral datasets (H1N1 and SARS-CoV-2)  
397 display the greatest bias in mean posterior reproductive number, substitution rate,  
398 and tMRCA when rounding to the month or year, with the average substitution time  
399 being less than one month in both simulation conditions. The *S. aureus* data pro-  
400 vide an intermediate case, with estimated parameters displaying bias when rounding  
401 dates to the year (average substitution time between the order of months to a year).  
402 Lastly, the *M. tuberculosis* data also provide supporting evidence in not displaying  
403 any notable bias between estimates at day, month, or year date-rounding. This is ex-  
404 pected because the average substitution time longer than a year in all *M. tuberculosis*

405 analyses.

406 We therefore propose the average substitution time as a rough practical threshold  
407 after which genomic epidemiologists can invariably expect date-rounding to distort in-  
408 ference. Genomic epidemiologists can make this assessment by calculating the average  
409 substitution time,  $T_s$ , as  $T_s = [\text{Genome Length (sites)} \times \text{Evolutionary rate (subs/site/yr)}]^{-1}$   
410 and checking whether  $T_s < \frac{1}{12}$  (indicating substitutions arising faster than monthly)  
411 when justifying rounding to the day, or  $T_s < 1$  (substitutions arising more than yearly)  
412 when justifying rounding to the month. In the more general terms, we propose that  
413 date rounding is problematic for fast-evolving RNA viruses, such as in the H1N1 and  
414 SARS-CoV-2 datasets. We urge others uploading data to repositories such as GISAID  
415 to include dates to the day where possible, and support the practice of including dates  
416 to the day on pathoplexus ([pathoplexus.org](https://pathoplexus.org)). This will increase the added-value of  
417 phylodynamic analysis for future infectious disease threats. Rounding to the year is  
418 sufficient for slowly evolving bacteria such as *M. tuberculosis*. We suggest case-by-case  
419 assessment for pathogens with intermediate average substitution times, such as the *S.*  
420 *aureus* herein and other faster-evolving bacteria including *Streptococcus*, multi-drug  
421 resistant *Escherichia coli*, or *Klebsiella pneumoniae* ([Gorrie et al., 2018](#), [Sherry et al.,](#)  
422 [2022](#), [Xie et al., 2024](#)). In the specific cases of *S. aureus* and other high disease-burden  
423 bacteria with asymptomatic and/or community carriage, we suggest preserving dates  
424 as much as possible to recover maximal information given the additional work that

425 is often dedicated to screening samples. Finally, we note that genome samples with  
426 or without rounded dates reflect considerable efforts in the field to collect and pro-  
427 cess samples. In the case where only low-resolution dates are available, we do not  
428 discourage phylodynamic analyses, but instead encourage additional analyses to test  
429 the effects of rounded dates, such as by including priors on sampling ranges.

430 We also strongly emphasise that this proposal is a rough guideline lacking rigor-  
431 ous mathematical derivation. Any degree of date-rounding may alter likelihood and  
432 parameter estimation in phylodynamic analyses. Other factors such as as the length  
433 of the sampling window, distribution of sampling times over this interval, and choice  
434 of tree prior also affect the direction and severity of bias when rounding dates.

435 Shorter sampling intervals can also exacerbate the bias due to date-rounding.  
436 For example, in the SARS-CoV-2 data and simulation conditions, most sequences  
437 originated over one month with the remainder towards the end of each of the previous  
438 two months. Bias for these data was greater for each parameter compared to otherwise  
439 similar H1N1 data, which had a more even distribution of sampling over three full  
440 months. This result is in line with previous results for ancient DNA data showing  
441 that date-rounding has negligible effects for timescales of millennia or longer, which  
442 we expect to span the average substitution time several-fold (Molak *et al.*, 2013). This  
443 emphasises the importance of accurate dates for phylodynamic datasets of emerging  
444 pathogens sequenced over shorter timescales, where results are likely to be the most

445 urgent and reflect shorter sampling intervals.

446 The choice of tree prior also affects bias when rounding dates. For example, the  
447 coalescent exponential tended to infer decreased substitution rates while the birth-  
448 death favoured increased substitution rates across simulated and empirical viral data.  
449 The inverse trend also arose for the tMRCA. This is because the birth-death draws  
450 additional information from clustered sampling times, which serves to elevate rates  
451 of substitution and transmission, while the coalescent conditions on these and relies  
452 more on the longer duration between sampling times at month resolution for both  
453 datasets.

454 Taken together, the results from the simulation study and empirical data show that  
455 although date-rounding biases epidemiological estimates in a theoretically predictable  
456 directions (upwards for transmission and substitution rates, downwards for tMRCA),  
457 the intensity of the bias is difficult to predict and varies with the distribution and  
458 span of sampling times as well as tree prior. We conclude that sufficiently accurate  
459 sampling times are essential where phylodynamic insight is needed to understand  
460 infectious disease epidemiology and evolution. There does not appear to be an clear  
461 way to adjust for the bias caused otherwise. Accurate sampling times will be essential  
462 for employing phylodynamics amid future infectious disease threats.

463 We also acknowledge that while accurate sampling times are essential for reliable  
464 phylodynamic results, it may pose an unacceptable level of risk to patient confiden-

465 tiality to release sampling times. We therefore emphasise the importance of methods  
466 that prioritise both patient confidentiality and data transparency and finish by dis-  
467 cussing potential future solutions.

## 468 **Translating dates by random seeds**

469 The functional component of phylodynamic data are the differences among genome  
470 sequences and among dates, rather than their absolute values. It may therefore be  
471 possible to protect patient confidentiality while sharing accurate dates by translating  
472 dates uniformly by a random number. This would protect the true sampling dates  
473 while preserving the relative times between them. For example, if the sampling times  
474 in a dataset of 3 genomes are 2000, 2001 and 2002, then data providers may randomly  
475 draw a number of 1000, which is kept secret, to shift dates. The genome-associated  
476 dates 2000, 2001 and 2002 are then shared as 3000, 3001 and 3002. While currently  
477 implausible, these translated dates are usable in phylodynamic analyses and preserve  
478 the distance between sampling times. Once results are returned the data provider  
479 can internally account for the translation in any estimated ages, such as node ages or  
480 the tMRCA, by subtracting 1000. For example if the estimated age of the outbreak  
481 (taken as the tMRCA) was 5 years before the most recent sample, then the data  
482 provider can privately estimate the outbreak's onset as 1997 (2002 - 5), while those  
483 conducting the analysis externally can only estimate the relative age of 5 years. In

484 the same way, intervals of transmission parameters such as  $R_e$  can be placed with  
485 respect to the true sampling times. Rates, such as growth or infection rates can also  
486 be accurately estimated via this method since these are not biased by shifting dates  
487 uniformly in time.

## 488 **Distributed computing**

489 Approaches based on distributed computing, where data are analysed across remote  
490 servers, also offer promise for maximising data transparency and patient confiden-  
491 tiality. For example, Santos *et al.* (2022) recently developed a method to estimate  
492 phylogenetic trees from private genome data using distributed computing and quan-  
493 tum cryptographic protocols. Routine phylodynamic analysis for genomic surveillance  
494 may also benefit from adopting protocols from so-called swarm learning approaches  
495 that allow artificial intelligence models in precision medicine to be trained across  
496 distributed datasets (together comprising a swarm) (Warnat-Herresthal *et al.*, 2021).  
497 Such approaches are in general complementary with hub-and-spoke networks, which  
498 are commonly used for storing sensitive pathogen genome data in national reposi-  
499 ries (Hoang *et al.*, 2022). We remain optimistic that future advances in distributed  
500 computing can eliminate the need for date-rounding in phylodynamic analysis.



## 501 Data Availability

502 All analyses and data used in this work can be accessed and run as a Snakemake  
503 pipeline at <https://github.com/LeoFeatherstone/pdp>.

## 504 Authors' Contributions

505 LAF designed the study, performed all analyses, and wrote the paper. DJI provided  
506 initial empirical data and contributed to writing of the manuscript. WW and SDG  
507 provided supervision and contributed to writing of the manuscript.

## 508 References

- 509 Attwood, S. W. *et al.* (2022). Phylogenetic and phylodynamic approaches to under-  
510 standing and combating the early sars-cov-2 pandemic. *Nature Reviews Genetics*,  
511 **23**(9), 547–562.
- 512 Azarian, T. *et al.* (2018). The impact of serotype-specific vaccination on phylo-  
513 dynamic parameters of *Streptococcus pneumoniae* and the pneumococcal pan-  
514 genome. *PLOS Pathogens*, **14**(4), e1006966. Publisher: Public Library of Science.
- 515 Bennett, S. *et al.* (2010). Epidemic Dynamics Revealed in Dengue Evolution. *Molec-  
516 ular Biology and Evolution*, **27**(4), 811–818.
- 517 Biek, R. *et al.* (2015). Measurably evolving pathogens in the genomic era. *Trends in  
518 Ecology & Evolution*, **30**(6), 306–313. Publisher: Elsevier.
- 519 Black, A. *et al.* (2020). Ten recommendations for supporting open pathogen genomic  
520 analysis in public health. *Nature medicine*, **26**(6), 832–841.
- 521 Bouckaert, R. *et al.* (2019). BEAST 2.5: An advanced software platform for bayesian  
522 evolutionary analysis. *PLOS Computational Biology*, **15**(4), e1006650. Publisher:  
523 Public Library of Science.

- 524 Cella, E. *et al.* (2017). Multi-drug resistant *Klebsiella pneumoniae* strains circulating  
525 in hospital setting: whole-genome sequencing and Bayesian phylogenetic analysis  
526 for outbreak investigations. *Scientific Reports*, **7**(1), 3534. Number: 1 Publisher:  
527 Nature Publishing Group.
- 528 Drummond, A. J. *et al.* (2003). Measurably evolving populations. *Trends in ecology*  
529 *& evolution*, **18**(9), 481–488.
- 530 du Plessis, L. and Stadler, T. (2015). Getting to the root of epidemic spread with  
531 phylodynamic analysis of genomic data. *Trends in Microbiology*, **23**(7), 383–386.
- 532 Duchêne, S. *et al.* (2016). Genome-scale rates of evolutionary change in bacteria.  
533 *Microbial Genomics*, **2**(11).
- 534 Featherstone, L. A. *et al.* (2021). Infectious disease phylodynamics with occur-  
535 rence data. *Methods in Ecology and Evolution*, **12**(8), 1498–1507. eprint:  
536 <https://onlinelibrary.wiley.com/doi/pdf/10.1111/2041-210X.13620>.
- 537 Featherstone, L. A. *et al.* (2022). Epidemiological inference from pathogen genomes:  
538 A review of phylodynamic models and applications. *Virus Evolution*, **8**(1), veac045.
- 539 Featherstone, L. A. *et al.* (2023). Decoding the Fundamental Drivers of Phylodynamic  
540 Inference. *Molecular Biology and Evolution*, **40**(6), msad132.
- 541 Gorrie, C. L. *et al.* (2018). Antimicrobial-Resistant *Klebsiella pneumoniae* Carriage  
542 and Infection in Specialized Geriatric Care Wards Linked to Acquisition in the  
543 Referring Hospital. *Clinical Infectious Diseases*, **67**(2), 161–170.
- 544 Hedge, J. *et al.* (2013). Real-time characterization of the molecular epidemiology of  
545 an influenza pandemic. *Biology Letters*, **9**(5), 20130331.
- 546 Hoang, T. *et al.* (2022). AusTrakka: Fast-tracking nationalized genomics surveillance  
547 in response to the COVID-19 pandemic. *Nature Communications*, **13**(1), 865.  
548 Publisher: Nature Publishing Group.
- 549 Kingman, J. F. C. (1982). The coalescent. *Stochastic Processes and their Applications*,  
550 **13**(3), 235–248.
- 551 Kühnert, D. *et al.* (2011). Phylogenetic and epidemic modeling of rapidly evolving  
552 infectious diseases. *Infection, genetics and evolution*, **11**(8), 1825–1841.
- 553 Kühnert, D. *et al.* (2018). Tuberculosis outbreak investigation using phylodynamic  
554 analysis. *Epidemics*, **25**, 47–53.

- 555 Lancet, T. (2021). Genomic sequencing in pandemics. *Lancet (London, England)*,  
556 **397**(10273), 445.
- 557 Lane, C. R. *et al.* (2021). Genomics-informed responses in the elimination of covid-19  
558 in victoria, australia: an observational, genomic epidemiological study. *The Lancet*  
559 *Public Health*, **6**(8), e547–e556.
- 560 Lemmon, A. R. and Moriarty, E. C. (2004). The importance of proper model assump-  
561 tion in bayesian phylogenetics. *Systematic Biology*, pages 265–277.
- 562 Mbala-Kingebeni, P. *et al.* (2019). Medical countermeasures during the 2018 ebola  
563 virus disease outbreak in the north kivu and ituri provinces of the democratic  
564 republic of the congo: a rapid genomic assessment. *The Lancet infectious diseases*,  
565 **19**(6), 648–657.
- 566 Merker, M. *et al.* (2015). Evolutionary history and global spread of the Mycobac-  
567 terium tuberculosis Beijing lineage. *Nature Genetics*, **47**(3), 242–249. Number: 3  
568 Publisher: Nature Publishing Group.
- 569 Molak, M. *et al.* (2013). Phylogenetic Estimation of Timescales Using Ancient DNA:  
570 The Effects of Temporal Sampling Scheme and Uncertainty in Sample Ages. *Molec-  
571 ular Biology and Evolution*, **30**(2), 253–262.
- 572 Rambaut, A. and Grass, N. C. (1997). Seq-gen: an application for the monte carlo  
573 simulation of DNA sequence evolution along phylogenetic trees. *Bioinformatics*,  
574 **13**(3), 235–238.
- 575 Raza, S. and Luheshi, L. (2016). Big data or bust: realizing the microbial genomics  
576 revolution. *Microbial Genomics*, **2**(2).
- 577 Rieux, A. and Khatchikian, C. E. (2017). Tipdatingbeast: An r package to assist  
578 the implementation of phylogenetic tip-dating tests using beast. *Molecular Ecology*  
579 *Resources*, **17**(4), 608–613.
- 580 Santos, M. B. *et al.* (2022). Private Computation of Phylogenetic Trees Based on  
581 Quantum Technologies. *IEEE Access*, **10**, 38065–38088. Conference Name: IEEE  
582 Access.
- 583 Shapiro, B. *et al.* (2011). A bayesian phylogenetic method to estimate unknown  
584 sequence ages. *Molecular biology and evolution*, **28**(2), 879–887.
- 585 Shean, R. C. and Greninger, A. L. (2018). Private collection: high correlation of sam-  
586 ple collection and patient admission date in clinical microbiological testing compli-  
587 cates sharing of phylodynamic metadata. *Virus Evolution*, **4**(1), vey005.

- 588 Sherry, N. L. *et al.* (2022). Multi-site implementation of whole genome sequencing  
589 for hospital infection control: A prospective genomic epidemiological analysis. *The*  
590 *Lancet Regional Health - Western Pacific*, **23**, 100446.
- 591 Stadler, T. *et al.* (2012). Estimating the basic reproductive number from viral se-  
592 quence data. *Molecular biology and evolution*, **29**(1), 347–357.
- 593 Sweeney, L. (2013). Matching Known Patients to Health Records in Washington  
594 State Data. *SSRN Electronic Journal*.
- 595 Talbi, C. *et al.* (2010). Phylodynamics and Human-Mediated Dispersal of a Zoonotic  
596 Virus. *PLOS Pathogens*, **6**(10), e1001166. Publisher: Public Library of Science.
- 597 Uhlemann, A.-C. *et al.* (2014). Molecular tracing of the emergence, diversification, and  
598 transmission of *S. aureus* sequence type 8 in a New York community. *Proceedings*  
599 *of the National Academy of Sciences*, **111**(18), 6738–6743. Publisher: Proceedings  
600 of the National Academy of Sciences.
- 601 Vaughan, T. G. (2024). ReMASTER: improved phylodynamic simulation for BEAST  
602 2.7. *Bioinformatics*, **40**(1), btae015.
- 603 Volz, E. (2023). Fitness, growth and transmissibility of SARS-CoV-2 genetic variants.  
604 *Nature Reviews Genetics*, pages 1–11. Publisher: Nature Publishing Group.
- 605 Volz, E. M. and Didelot, X. (2018). Modeling the Growth and Decline of Pathogen  
606 Effective Population Size Provides Insight into Epidemic Dynamics and Drivers of  
607 Antimicrobial Resistance. *Systematic Biology*, **67**(4), 719–728.
- 608 Volz, E. M. and Frost, S. D. W. (2014). Sampling through time and phylodynamic  
609 inference with coalescent and birth-death models. *Journal of the Royal Society,*  
610 *Interface*, **11**(101), 20140945.
- 611 Warnat-Herresthal, S. *et al.* (2021). Swarm Learning for decentralized and confi-  
612 dential clinical machine learning. *Nature*, **594**(7862), 265–270. Publisher: Nature  
613 Publishing Group.
- 614 WHO (2024). WHO bacterial priority pathogens list, 2024: Bacterial pathogens of  
615 public health importance to guide research, development and strategies to prevent  
616 and control antimicrobial resistance.
- 617 Wolf, J. M. *et al.* (2022). Temporal spread and evolution of SARS-CoV-2 in the  
618 second pandemic wave in Brazil. *Journal of Medical Virology*, **94**(3), 926–936.  
619 eprint: <https://onlinelibrary.wiley.com/doi/pdf/10.1002/jmv.27371>.

- 620 Xiao, J. *et al.* (2022). Genomic Epidemiology and Phylodynamic Analysis of En-  
621 terovirus A71 Reveal Its Transmission Dynamics in Asia. *Microbiology Spectrum*,  
622 **10**(5), e01958–22. Publisher: American Society for Microbiology.
- 623 Xie, O. *et al.* (2024). Temporal and Geographic Strain Dynamics of Invasive Strepto-  
624 coccus Pyogenes In Australia: A Multi-Centre Clinical and Genomic Epidemiology  
625 Study 2011-2023. *Preprints with The Lancet*.

626 **Supplementary Material**

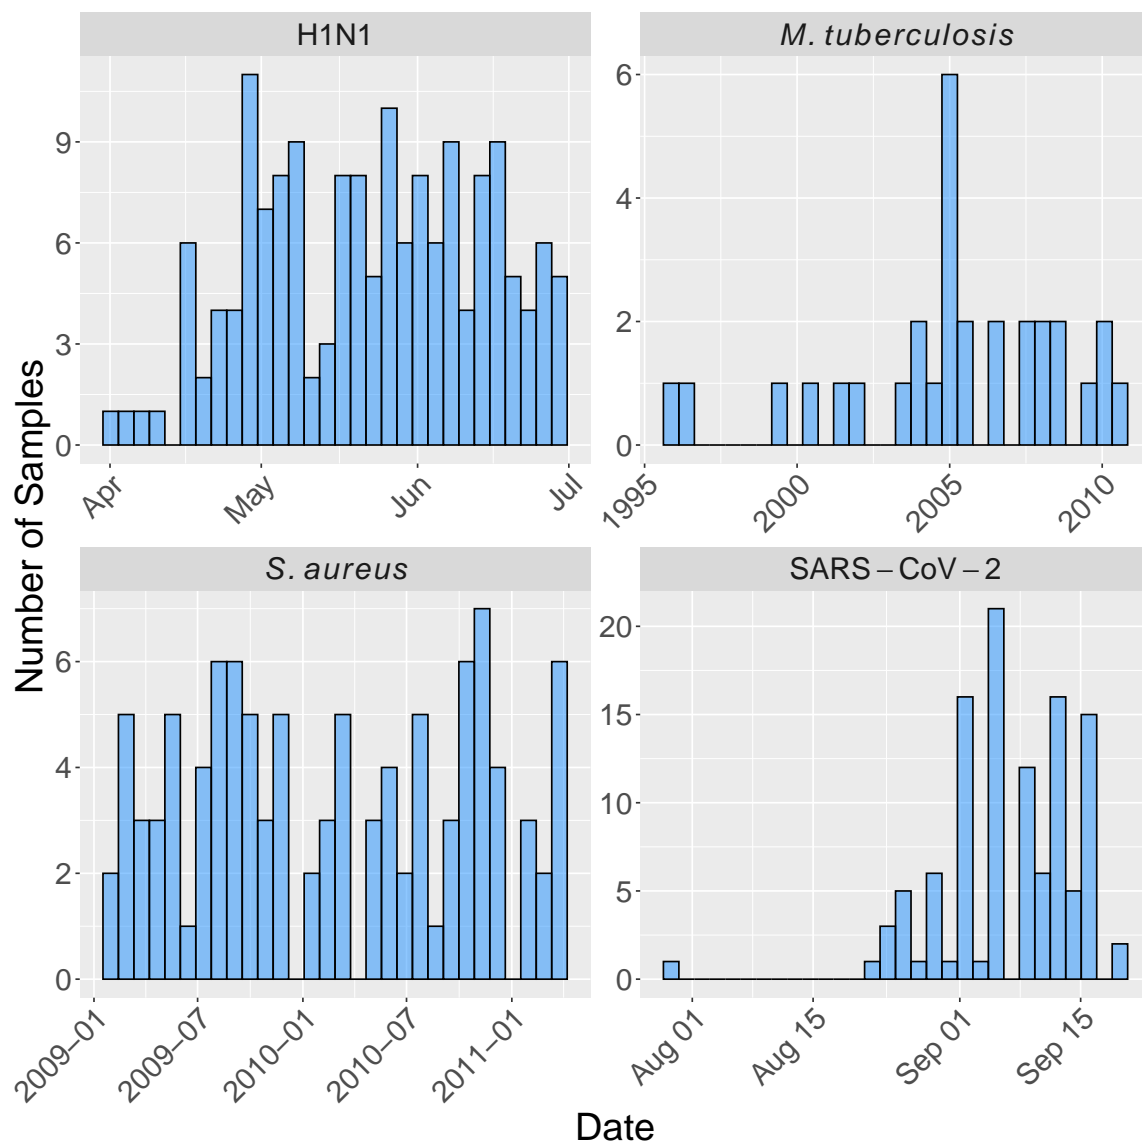

Figure S1: The number of samples over time for each empirical dataset. Date-rounding has the effect of moving each sampling within a month or year to the middle of that month or year (15<sup>th</sup> of the month or June 15<sup>th</sup> of the year).

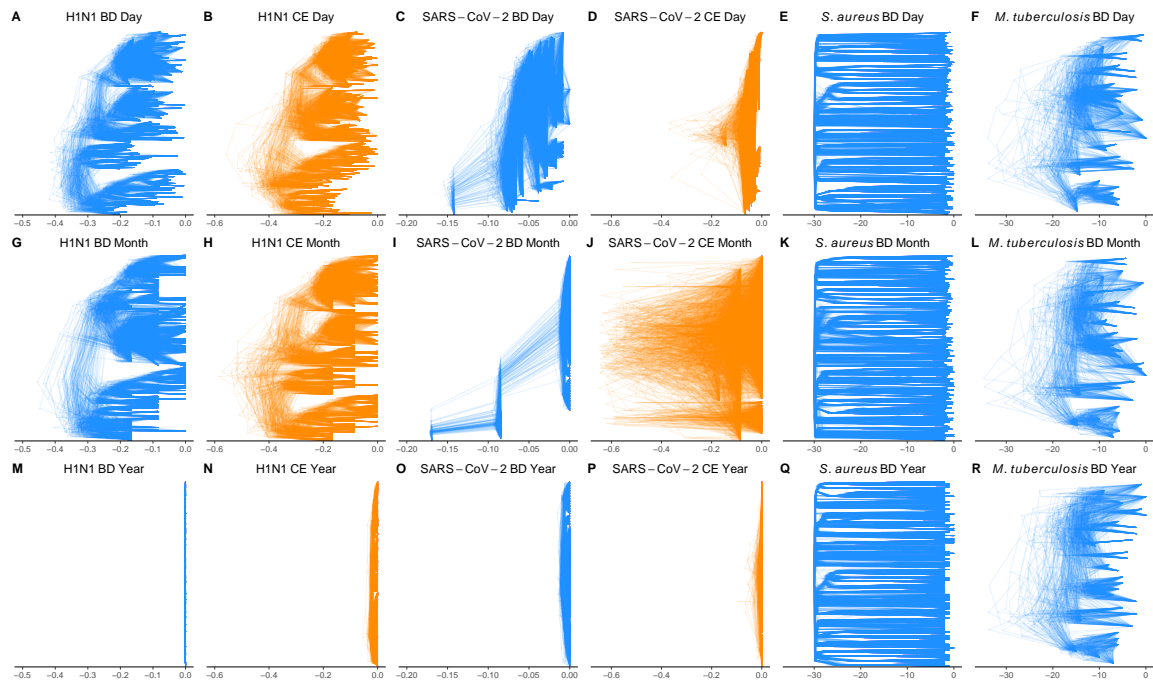

Figure S2: Desnitrees (overlaid posterior trees) for empirical data with columns corresponding to pathogen under each combination of date resolution and tree prior. For the H1N1 and SARS-CoV-2 treatments, Year resolution causes trees to collapse to instantaneous bursts.

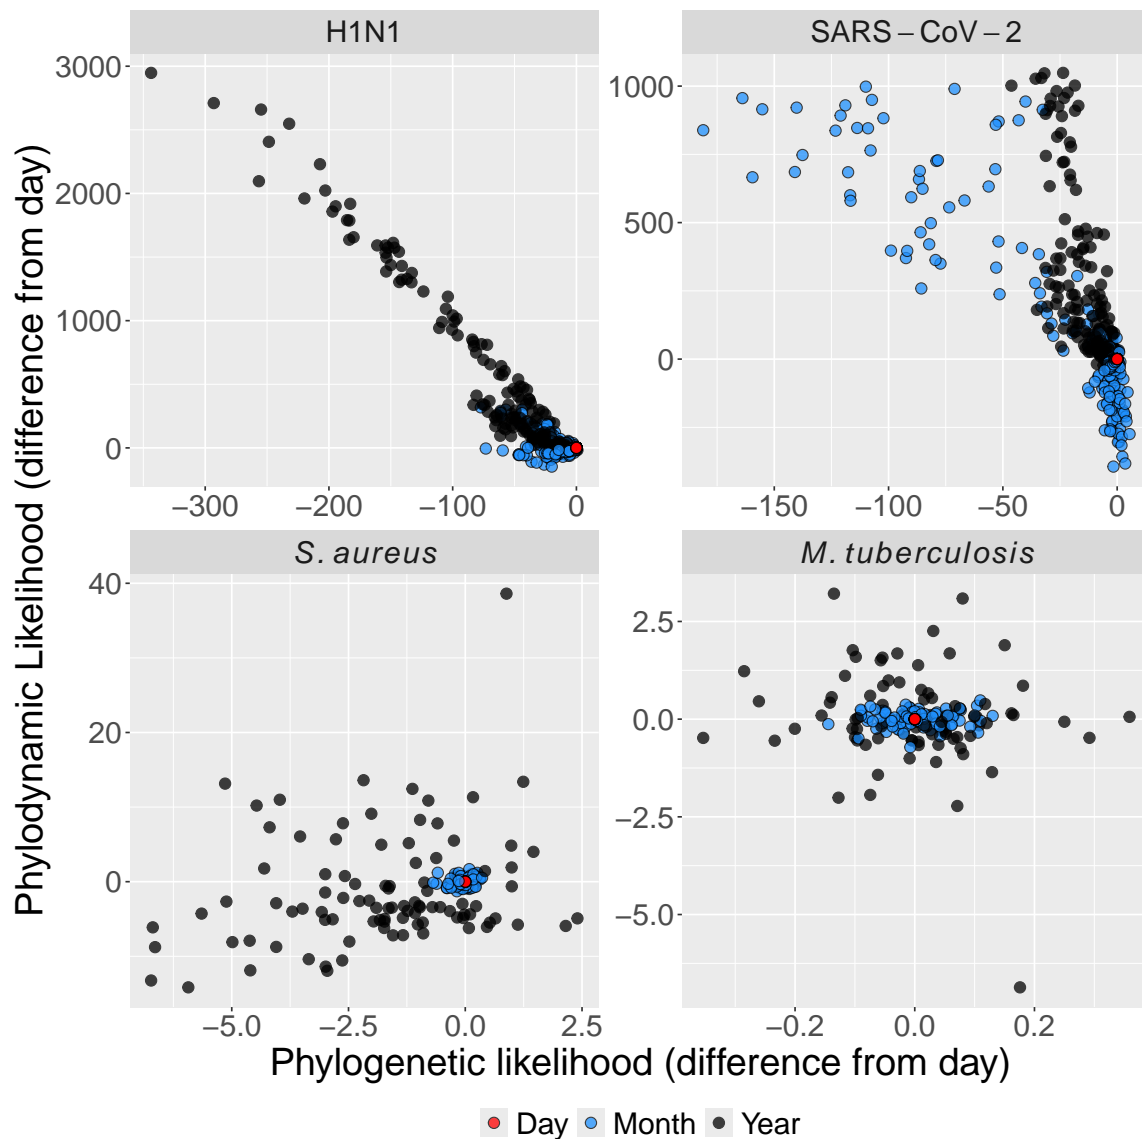

Figure S3: Adjusted phylodynamic likelihood against adjusted phylogenetic likelihood with panels corresponding to each simulation condition. Points correspond to mean posterior likelihood for each simulated dataset under each simulation condition. Colour corresponds to date resolution. Likelihoods are adjusted by subtracting the mean phylodynamic or phylogenetic likelihood at Day resolution from each the means under Month and year resolution. Resulting points therefore show the difference phylodynamic and phylogenetic likelihoods due to date-rounding with the point (0,0) representing likelihood at day resolution for each dataset. Month resolution generally results in smaller differences than Year resolution, suggesting coarser date resolution results in more perturbed likelihoods. There is also generally more error in phylodynamic likelihood than phylogenetic likelihood.



Table S1: Mean posterior estimates of substitution rate and tMRCA for empirical data with 95% HPD in brackets. The lower table gives mean posterior estimates of  $R_{\bullet}$  for empirical data with 95% HPD in brackets.

|                        | Tree Prior | Resolution | Substitution Rate (subs/site/yr) | tMRCA                       |
|------------------------|------------|------------|----------------------------------|-----------------------------|
| H1N1                   | BD         | Day        | 4.31e-3 (3.7e-3, 4.9e-3)         | 3.67e-1 (3.3e-1, 4.2e-1)    |
| H1N1                   | BD         | Month      | 3.9e-3 (3.2e-3, 4.6e-3)          | 3.53e-1 (3.1e-1, 4.1e-1)    |
| H1N1                   | CE         | Day        | 3.87e-3 (3.2e-3, 4.5e-3)         | 4.25e-1 (3.6e-1, 5.0e-1)    |
| H1N1                   | CE         | Month      | 3.17e-3 (2.6e-3, 3.8e-3)         | 4.59e-1 (3.8e-1, 5.6e-1)    |
| SARS-CoV-2             | BD         | Day        | 2.47e-4 (1.1e-4, 4.5e-4)         | 1.45e-1 (1.4e-1, 1.5e-1)    |
| SARS-CoV-2             | BD         | Month      | 6.56e-4 (3.3e-4, 1.1e-3)         | 1.7e-1 (1.7e-1, 1.7e-1)     |
| SARS-CoV-2             | CE         | Day        | 2.37e-4 (9.1e-5, 4.7e-4)         | 2.03e-1 (1.4e-1, 3.6e-1)    |
| SARS-CoV-2             | CE         | Month      | 4.34e-5 (4.4e-6, 1.4e-4)         | 1.6 (2.9e-1, 5.9)           |
| <i>S. aureus</i>       | BD         | Day        | 1e-5 (1e-5, 1e-5)                | 3e+01 (3e+01, 3e+01)        |
| <i>S. aureus</i>       | BD         | Month      | 1e-5 (1e-5, 1e-5)                | 3e+01 (3e+01, 3e+01)        |
| <i>S. aureus</i>       | BD         | Year       | 1e-5 (1e-5, 1e-5)                | 3e+01 (3e+01, 3e+01)        |
| <i>M. tuberculosis</i> | BD         | Day        | 1.02e-7 (6.5e-8, 1.4e-7)         | 2.17e+01 (1.7e+01, 3.2e+01) |
| <i>M. tuberculosis</i> | BD         | Month      | 1.02e-7 (6.6e-8, 1.4e-7)         | 2.17e+01 (1.7e+01, 3.2e+01) |
| <i>M. tuberculosis</i> | BD         | Year       | 9.86e-8 (6.2e-8, 1.4e-7)         | 2.25e+01 (1.8e+01, 3.4e+01) |

  

|                        | Tree Prior | Resolution | $R_0$              | $R_{e1}$           | $R_{e2}$                 |
|------------------------|------------|------------|--------------------|--------------------|--------------------------|
| H1N1                   | BD         | Day        | 1.08 (1.1, 1.1)    | -                  | -                        |
| H1N1                   | BD         | Month      | 1.14 (1.1, 1.2)    | -                  | -                        |
| H1N1                   | CE         | Day        | 1.14 (1.1, 1.2)    | -                  | -                        |
| H1N1                   | CE         | Month      | 1.13 (1.1, 1.2)    | -                  | -                        |
| SARS-CoV-2             | BD         | Day        | 1.2 (9.3e-1, 1.6)  | -                  | -                        |
| SARS-CoV-2             | BD         | Month      | 5.85 (3.7, 9.0)    | -                  | -                        |
| SARS-CoV-2             | CE         | Day        | 1 (9.6e-1, 1.0)    | -                  | -                        |
| SARS-CoV-2             | CE         | Month      | 1.01 (9.8e-1, 1.1) | -                  | -                        |
| <i>S. aureus</i>       | BD         | Day        | -                  | 1.57 (1.5, 1.7)    | 6.56e-1 (5.1e-1, 8.0e-1) |
| <i>S. aureus</i>       | BD         | Month      | -                  | 1.56 (1.5, 1.7)    | 6.78e-1 (5.4e-1, 8.3e-1) |
| <i>S. aureus</i>       | BD         | Year       | -                  | 1.73 (1.6, 1.8)    | 3.71e-1 (1.9e-1, 5.4e-1) |
| <i>M. tuberculosis</i> | BD         | Day        | -                  | 2.77 (5.8e-1, 5.3) | 1.4 (7.2e-1, 2.7)        |
| <i>M. tuberculosis</i> | BD         | Month      | -                  | 2.74 (5.7e-1, 5.0) | 1.41 (7.4e-1, 2.7)       |
| <i>M. tuberculosis</i> | BD         | Year       | -                  | 2.66 (4.6e-1, 5.1) | 1.53 (8.1e-1, 2.9)       |
